# Supplementary figures and images for: PPAR gamma and PGC‐1alpha activators protect against diabetic nephropathy by suppressing the inflammation and NF‐kappaB activation
Source: PubMed Central journal article supplement — Nephrology (Carlton). 2024 Sep 4;29(12):858–72. doi: 10.1111/nep.14381 (PMC11579552; doi:10.1111/nep.14381), 2024-09-04

Supplement

**Supplement**

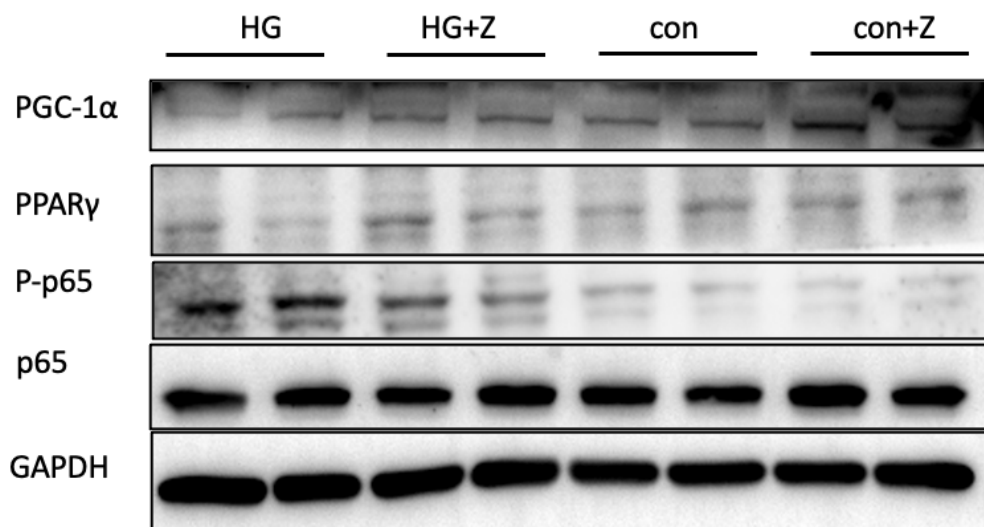

Supplement

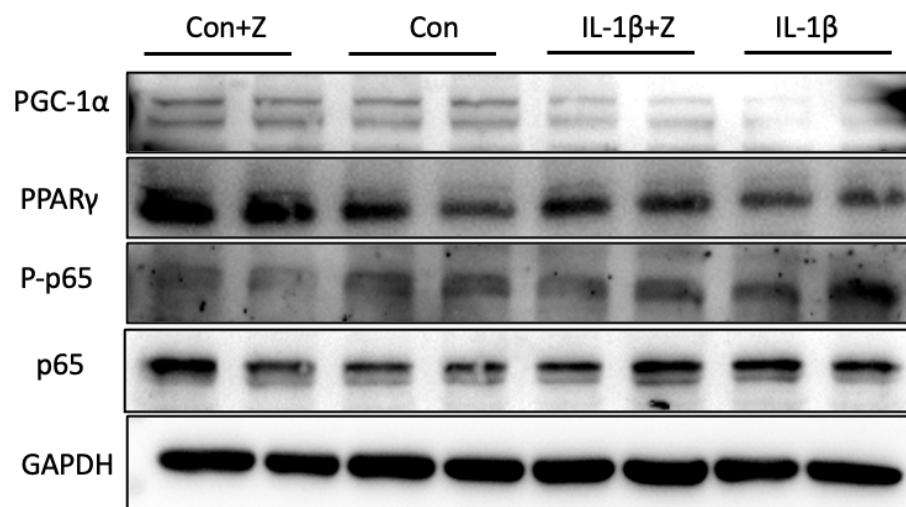

Supplement: NEP-29-858-s001.pdf [file NEP-29-858-s001.pdf]
